# Supplementary material for: Positioning In Macular hole Surgery (PIMS): statistical analysis plan for a randomised controlled trial
Source: Springer Nature journal article supplement (doi:10.1186/s13063-017-2020-6), 2017-06-13
Supplement: MOESM1 [file 12441960]

## Tables

**Table 1 – Baseline characteristics**

|                                                           | <i>Face-forward<br/>positioning (n=...)</i> | <i>Face-down<br/>positioning (n=...)</i> |
|-----------------------------------------------------------|---------------------------------------------|------------------------------------------|
| <i>Age (years) – median (IQR)</i>                         |                                             |                                          |
| <i>Male – no. (%)</i>                                     |                                             |                                          |
| <i>Ethnicity – no. (%)</i>                                |                                             |                                          |
| <i>White</i>                                              |                                             |                                          |
| <i>Black</i>                                              |                                             |                                          |
| <i>Asian</i>                                              |                                             |                                          |
| <i>Mixed</i>                                              |                                             |                                          |
| <i>Other</i>                                              |                                             |                                          |
| <i>Laterality – Left Side – no. (%)</i>                   |                                             |                                          |
| <i>Duration of symptoms (months) – median (IQR)</i>       |                                             |                                          |
| <i>BCVA (Best-Corrected Visual Acuity) – median (IQR)</i> |                                             |                                          |
| <i>Lens Status – Phakic – no (%)</i>                      |                                             |                                          |
| <i>Macular hole diameter on OCT – median (IQR)</i>        |                                             |                                          |
| <i>Quality of life VFQ-25 – median (IQR)</i>              |                                             |                                          |

**Table 2 – Main results for primary outcomes**

|                                                       | <b>Face-forward<br/>positioning<br/>(n=...)</b> | <b>Face-down<br/>positioning<br/>(n=...)</b> | <b>Odds Ratio (95% CI)</b> | <b>P-value</b> |
|-------------------------------------------------------|-------------------------------------------------|----------------------------------------------|----------------------------|----------------|
| <i>Successful closure of<br/>macular hole - n (%)</i> |                                                 |                                              |                            |                |

**Table 3 – Main results for dichotomous secondary outcomes**

|                                                                                                                                              | <b>Face-forward<br/>positioning<br/>(n=...)</b> | <b>Face-down<br/>positioning<br/>(n=...)</b> | <b>Odds Ratio (95%<br/>CI)</b> | <b>P-value</b> |
|----------------------------------------------------------------------------------------------------------------------------------------------|-------------------------------------------------|----------------------------------------------|--------------------------------|----------------|
| <i>Further surgery for<br/>macular holes,<br/>performed or planned,<br/>of those with<br/>unsuccessful closure of<br/>macular hole –n(%)</i> |                                                 |                                              |                                |                |
| <i>Dichotomised Patient-<br/>reported experience of<br/>positioning at 3<br/>months- n(%)</i>                                                |                                                 |                                              |                                |                |
| <i>Patient reported<br/>outcome, if they would<br/>still have elected to<br/>have the operation</i>                                          |                                                 |                                              |                                |                |
| <i>Yes – n(%)</i>                                                                                                                            |                                                 |                                              |                                |                |
| <i>Yes/Don't know<br/>(sensitivity analysis)<br/>– n(%)</i>                                                                                  |                                                 |                                              |                                |                |

**Table 4 – Main results for transformed continuous secondary outcomes**

|                                                                                                                                                                                                                   | <b>Face-forward<br/>positioning (n=...)</b> | <b>Face-down<br/>positioning<br/>(n=...)</b> | <b>Regression<br/>coefficient (95% CI)</b> | <b>P-value</b> |
|-------------------------------------------------------------------------------------------------------------------------------------------------------------------------------------------------------------------|---------------------------------------------|----------------------------------------------|--------------------------------------------|----------------|
| <i>LogMAR conversion of<br/>Best corrected visual<br/>acuity (BCVA) using<br/>standard Snellen chart<br/>at 6m at 3 months -<br/>mean (sd)</i>                                                                    |                                             |                                              |                                            |                |
| <i>Logistic transformation<br/>of Patient-reported<br/>health and quality of<br/>life as assessed at 3<br/>months using National<br/>Eye Institute Visual<br/>Function Questionnaire<br/>(VFQ-25) – mean (sd)</i> |                                             |                                              |                                            |                |

**Table 5- Main results for untransformed secondary outcomes**

|                                                                                                                                                               | <b>Face-forward<br/>positioning (n=...)</b> | <b>Face-down<br/>positioning (n=...)</b> |
|---------------------------------------------------------------------------------------------------------------------------------------------------------------|---------------------------------------------|------------------------------------------|
| <i>Best-corrected Visual Acuity (BCVA) using standard Snellen chart at 6m at 3 months - median (IQR)</i>                                                      |                                             |                                          |
| <i>Patient-reported health and quality of life as assessed at 3 months using National Eye Institute Visual Function Questionnaire (VFQ-25) – median (IQR)</i> |                                             |                                          |
| <i>Patient-reported experience of positioning at 3 months- median (IQR)</i>                                                                                   |                                             |                                          |

**Table 6 – Patient reported outcome, if they would still have elected to have the operation**

|                          | <b>Face-forward<br/>positioning (n=...)</b> | <b>Face-down<br/>positioning (n=...)</b> |
|--------------------------|---------------------------------------------|------------------------------------------|
| <i>Yes – n(%)</i>        |                                             |                                          |
| <i>No - n(%)</i>         |                                             |                                          |
| <i>Don't know - n(%)</i> |                                             |                                          |
| <i>Missing - n(%)</i>    |                                             |                                          |

**Table 7 – Combined surgery (removal of patient’s lens as a prophylactic procedure) by site.**

| <b>Site</b>   | <b>Combined surgery (n%)<br/>in total)</b> |
|---------------|--------------------------------------------|
| Site A – n(%) |                                            |
| Site B – n(%) |                                            |
| Site C – n(%) |                                            |
| Site D – n(%) |                                            |
| Site E –n(%)  |                                            |
| Site F –n(%)  |                                            |
| Site G –n(%)  |                                            |
| Site H –n(%)  |                                            |
| Site I –n(%)  |                                            |

**Table 8 – Number of participants with non-missing data**

| <b>Outcome</b>                                                                                                                                                        | <b>Face-forward<br/>positioning (n=.)</b> | <b>Face-down<br/>positioning<br/>(n=.)</b> |
|-----------------------------------------------------------------------------------------------------------------------------------------------------------------------|-------------------------------------------|--------------------------------------------|
| <i>Further surgery for macular holes, performed or planned, of those with unsuccessful closure of macular hole –n(%)</i>                                              |                                           |                                            |
| <i>Best-corrected visual acuity (BCVA) measured using Snellen charts at a standard distance of 6 metres– n(%)</i>                                                     |                                           |                                            |
| <i>Patient-reported experience of positioning at 3 months – n(%)</i>                                                                                                  |                                           |                                            |
| <i>Patient-reported health and quality of life as assessed at baseline and at 3 months using National Eye Institute Visual Function Questionnaire (VFQ-25) – n(%)</i> |                                           |                                            |
| <i>Patient reported outcome, if they would still have elected to have the operation – n(%)</i>                                                                        |                                           |                                            |

**Table 9 – Number of patients who experience complications in surgery and number of patients who with complications who withdrew from the trial, by treatment arm.**

|                                                                                      | <i>Face-forward<br/>positioning (n=.)</i> | <i>Face-down<br/>positioning<br/>(n=.)</i> |
|--------------------------------------------------------------------------------------|-------------------------------------------|--------------------------------------------|
| Number of patients with complications during surgery                                 |                                           |                                            |
| Number of patient with complications during surgery who then withdrew from the trial |                                           |                                            |

**Table 10 – Number of Patients who experienced a Serious Adverse Event, by treatment arm and if this event was expected or unexpected.**

|                                                                                   | <i>Face-forward<br/>positioning (n=.)</i> | <i>Face-down<br/>positioning<br/>(n=.)</i> |
|-----------------------------------------------------------------------------------|-------------------------------------------|--------------------------------------------|
| Number of patients who experienced a Serious Adverse Event which was expected     |                                           |                                            |
| Number of patients who experienced a Serious Adverse Event which was not expected |                                           |                                            |



**Table 11 – The number of patients for each BCVA category, and the corresponding conversion, by treatment arm.**

|                                                   | <i>Face-forward<br/>positioning (n=.)</i> | <i>Face-down<br/>positioning (n=.)</i> |
|---------------------------------------------------|-------------------------------------------|----------------------------------------|
| Counting fingers (CF) substituted for 2.10        |                                           |                                        |
| Hand movement (HM) substituted for 2.40           |                                           |                                        |
| Perception of light (PL) substituted for 2.70     |                                           |                                        |
| No perception of light (NPL) substituted for 3.00 |                                           |                                        |
